# Supplementary material for: Deacetylation induced nuclear condensation of HP1γ promotes multiple myeloma drug resistance
Source: PubMed Central journal article supplement (PMC9998874; doi:10.1038/s41467-023-37013-x), 2023-03-09
Supplement: 41467_2023_37013_MOESM1_ESM.pdf [file 41467_2023_37013_MOESM1_ESM.pdf]

## Supplementary Figures and Legends

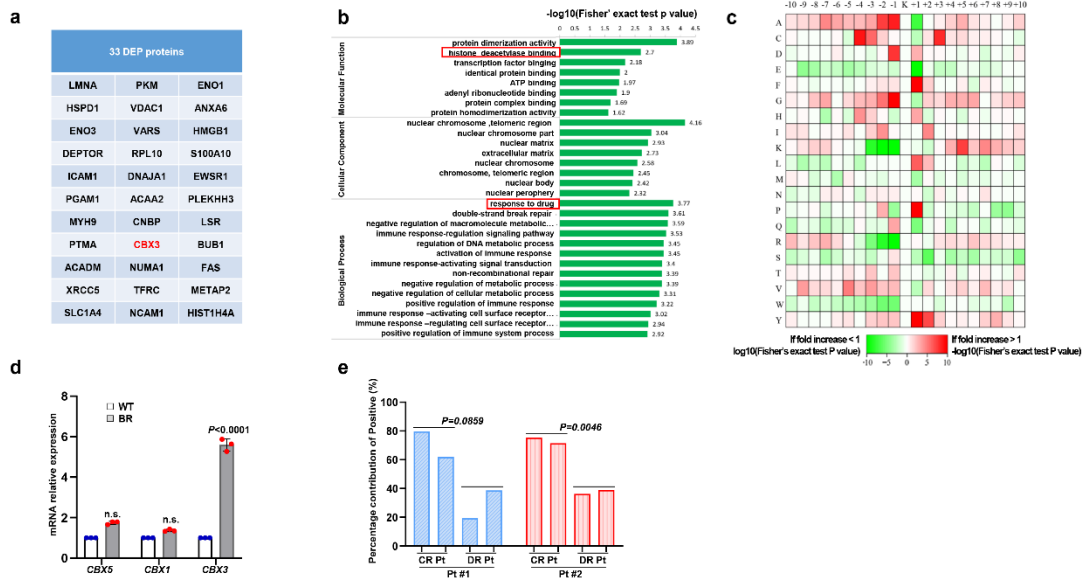

### Supplementary Fig. 1: Differentially expressed proteins in drug-resistant MM cells

**a** List of SILAC assay-identified 33 DEP proteins in proteomics and acetylome in BR and WT MM.1S cells. **b** GO enrichment analysis shows the biological processes and cellular functions of DEP proteins in the BR MM.1S cells. **c** Motif analysis of all identified acetylated sites in SILAC assay for the BR MM.1S cells. **d** QPCR detecting the genes of HP1 family genes in WT and BR MM.1S cells (mean  $\pm$  s.d.;  $n=3$  independent experiments). **e** Quantification of the positive staining in Figure 1K, DR vs CR.  $P$  values were determined by Student's  $t$  test (**d**, **e**). Source data are provided as a Source data file.

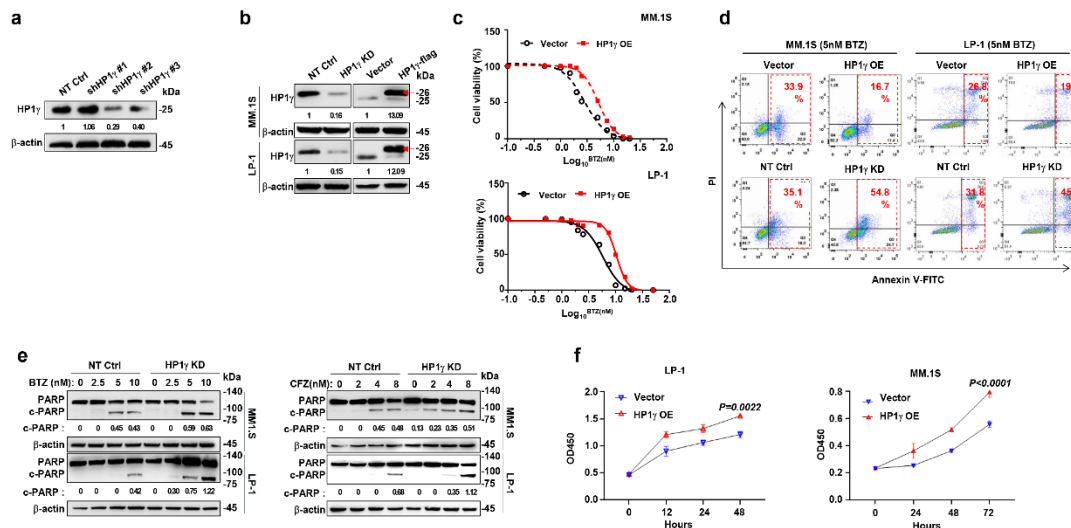

**Supplementary Fig. 2: Effects of HP1 $\gamma$  on MM cell apoptosis.** **a** Western blotting shows the efficacy of three shRNAs targeting HP1 $\gamma$  in HEK293T cells, and **(b)** validates the knockdown efficacy of shRNA#2 (HP1 $\gamma$  KD) and overexpression efficacy of HP1 $\gamma$  (HP1 $\gamma$  OE) in MM cells. **c** Alteration of IC<sub>50</sub> to BTZ treatment in the Vector and HP1 $\gamma$  OE cells (n = 3). **d** Representative flow cytometry assay to detect the percentage of apoptotic cells in the Vector, HP1 $\gamma$  OE, non-target control (NT Ctrl) and HP1 $\gamma$  KD MM cells induced by 5 nM BTZ for 48 hr. **e** Cleavage of PARP as the apoptotic marker in MM.1S and LP-1 cells with HP1 $\gamma$  expression manipulated by shRNA or ectopic expression vector, treated with increasing dosage of BTZ and carfilzomib (CFZ) for 24 hr. **f** Cell proliferation of LP-1 and MM.1S cells stably expressing vector (Vector) or HP1 $\gamma$  OE (mean  $\pm$  s.d.; n= 3 independent experiments). Differences between groups were assessed by one-way ANOVA test. Source data are provided as a Source data file.

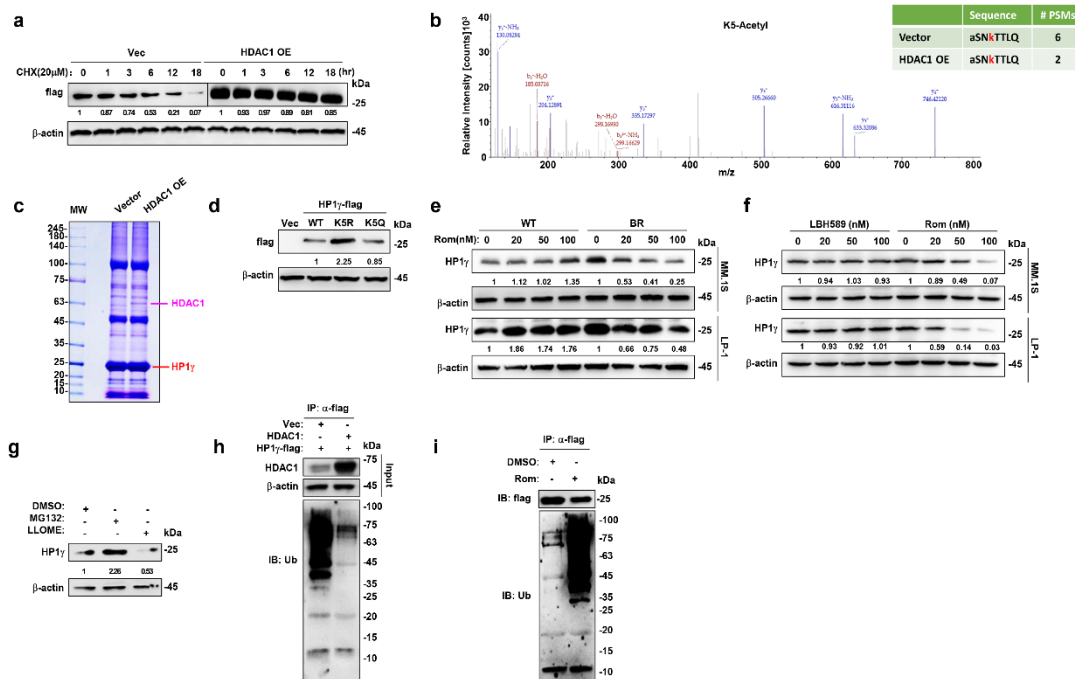

**Supplementary Fig. 3: Acetylation modification enhances ubiquitination of HP1 $\gamma$ .**

**a** Degradation of HP1 $\gamma$ -flag protein in HEK293T transfected with HDAC1 and treated with 20  $\mu$ M cycloheximide (CHX) for 12hr. **b** Mass spectra of enriched acetylated peptides containing K5 sites in HP1 $\gamma$ -flag proteins. Upper: Degree of enrichment of acetylated lysine sequences of HP1 $\gamma$  in Vector and HDAC1 OE groups. PSM (peptide-spectrum matches) is positively correlated with abundance. **c** Coomassie blue staining

for flag-pulldown in HEK293T cells transfected with vector or HP1 $\gamma$ -flag for 48 hr. **d** Western blotting shows the HP1 $\gamma$  protein level in the HEK293T cells transfected with flag-tagged HP1 $\gamma$  WT, K5R and K5Q. **e** Levels of HP1 $\gamma$  protein in WT and BR MM.1S and LP-1 cells treated with gradient concentration of Romidepsin (Rom) for 24 hr. **f** Western blotting shows the levels of HP1 $\gamma$  protein in MM.1S and LP-1 cells treated with gradient concentration of LBH589 and Rom for 24 hr. **g** Western blotting shows HP1 $\gamma$  levels in LP-1 cell treated with DMSO, MG132 (20 $\mu$ M) and LLOME (L-leucyl-L-leucine methyl ester, 20 $\mu$ M) for 24hr. Ubiquitination status of HP1 $\gamma$  in HEK293T cells transfected with **(h)** HDAC1 for 48 hr, or **(i)** Rom (100nM) for 24 hr. Source data are provided as a Source data file.

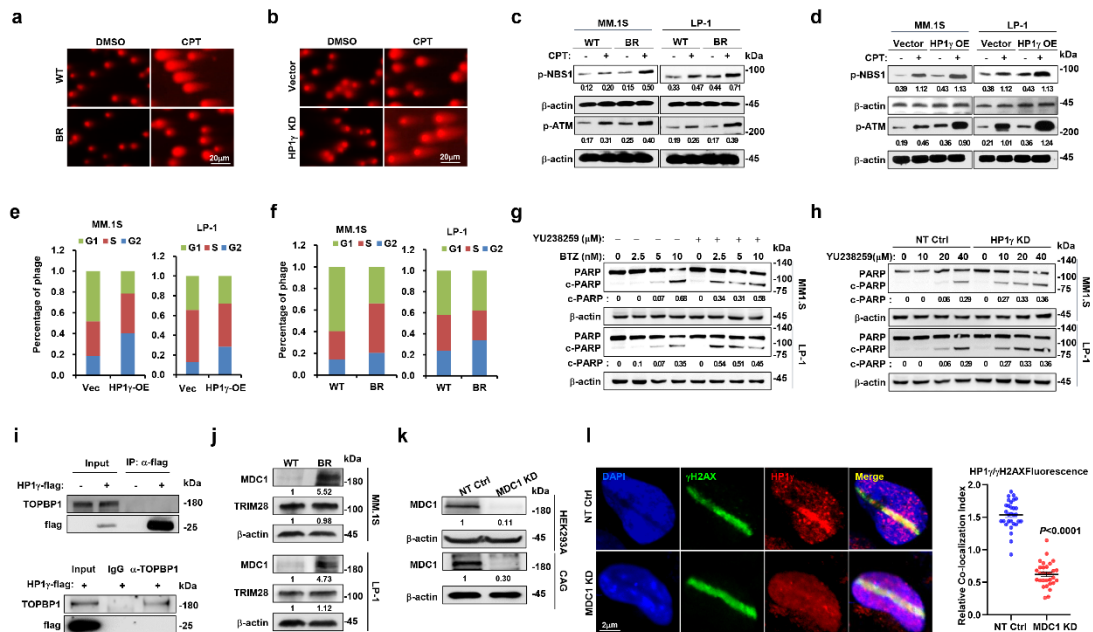

**Supplementary Fig. 4: MDC1 recruits HP1 $\gamma$  and HP1 $\gamma$  facilitates homologous recombination.** **a** Comet assay images showing DNA damage in WT and BR MM.1S cells treated with DMSO or CPT, and **(b)** in Vector and HP1 $\gamma$  OE MM.1S cells treated with DMSO or CPT. **c** Western blotting shows p-NBS1 and p-ATM levels in WT and BR, and in **(d)** Vector and HP1 $\gamma$  OE MM.1S and LP-1 cells. **e** Cell cycle assay of the WT, BR and **(f)** stably expressing Vector or HP1 $\gamma$  OE MM.1S and LP-1 cells. **g** Cleaved PARP in NT Ctrl and HP1 $\gamma$  KD cell treated with HR inhibitor-YU238259 for 24 hr, and **(h)** in MM cell treated with increasing dosage of BTZ combined with YU238259 for

24 hr. **i** Co-IP assay shows bilateral interactions between exogenous HP1 $\gamma$  with TOPBP1. **j** Levels of MDC1 and TRIM28 in the WT and BR MM.1S and LP-1 cells. **k** Knockdown efficacy of MDC1 KD in CAG and HEK293A cells. **l** Left: immunofluorescence assay demonstrating the HP1 $\gamma$  recruited to DNA damage regions in HEK293A cells. The focused regions of DNA damage were produced by using a scanning laser system. Right: the graph represents the relative co-localization index of the HP1 $\gamma$  protein on the  $\gamma$ H2AX track. Error bars represent S.E.M., n= 3 independent experiments and differences relative to NT Ctrl were calculated using student's t test. Source data are provided as a Source data file.

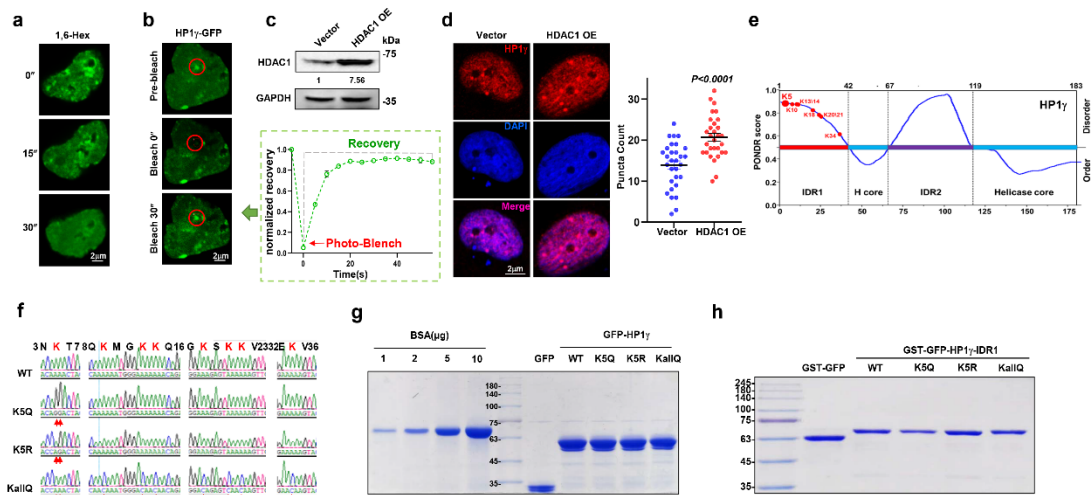

**Supplementary Fig. 5: Deacetylation enhances nuclear condensation of HP1 $\gamma$ .** **a** Fluorescence intensity of full length GFP-HP1 $\gamma$  (FL) in HEK293T cells before and after treatment with 3% 1,6-hexanediol (1,6-Hex) at different time. **b** Fluorescence recovery after photobleaching (FRAP) assay of HP1 $\gamma$ -GFP in HEK293T cells (mean  $\pm$  s.d.; n= 3 independent experiments). **c** Western blotting shows the overexpression efficacy of HDAC1 in HEK293T cells. **d** Representative images for HP1 $\gamma$  foci in HEK293T cells with or without HDAC1 OE (mean  $\pm$  s.d.; n= 3 independent experiments). Quantification of puncta count is shown in images. Two-sided P values were determined by Student's t test. **e** Analysis of the HP1 $\gamma$  protein sequence for intrinsically disordered regions using the program VL3-BA. Red dots, potential acetylated lysine sites. **f** Sequence alignment of CBX3 (HP1 $\gamma$ ) -WT, K5Q, K5R and KallQ. The site of lysine

acetylation mutants indicated by red arrows. **g** Coomassie blue staining shows *in vitro* expression of GFP, (GFP-HP1 $\gamma$ ) -WT, -K5Q, -K5R, -KallQ fusion protein, and **(h)** GST-GFP, (GST-GFP-HP1 $\gamma$ -IDR1) -WT, -K5Q, -K5R, -KallQ fusion protein. Source data are provided as a Source data file.

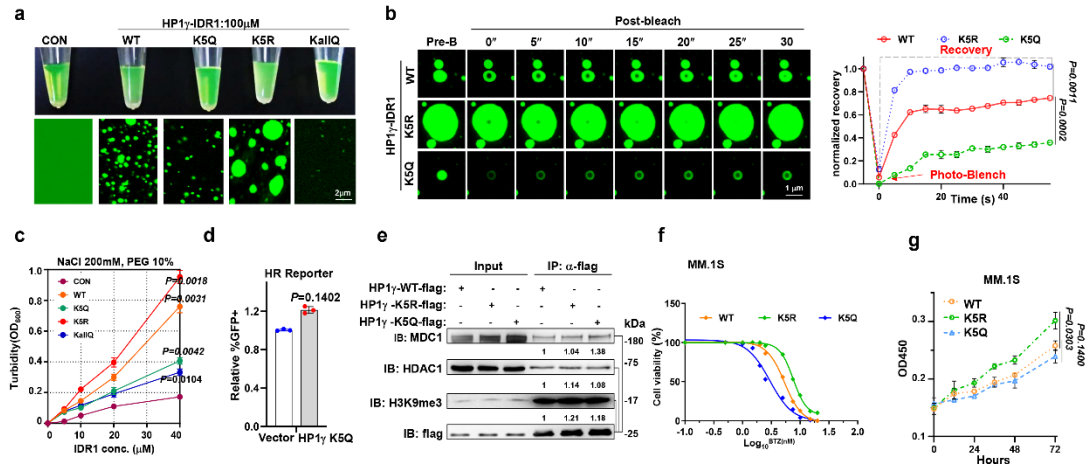

**Supplementary Fig. 6: Enhancing nuclear condensation of HP1 $\gamma$  promote drug**

**resistance to BTZ. a** Visualization of turbidity associated with droplet formation *in vitro* for the GFP-vector control (Ctrl), (HP1 $\gamma$ -IDR1) -WT, K5Q, K5R or KallQ. **b** Microscopy images of GFP fusion proteins of (HP1 $\gamma$ -IDR1) -WT, -K5Q and -K5R before and after partial droplet photobleaching *in vitro* (mean  $\pm$  s.d.; n= 3 independent experiments), and two-sided *P*-values of the comparisons between the final extent of recovery after photobleaching (i.e. 60 s) were performed using one-way ANOVA. **c** Turbidity (OD<sub>600</sub>) of WT, K5Q, K5R, and KallQ mutants of HP1 $\gamma$ -IDR1 in 200 mM NaCl and 10% PEG was measured (mean  $\pm$  s.d.; n= 3 independent experiments). *P* values were determined by Pearson's coefficient and Student's *t* test. **d** Quantitative assessment of HR activity in the HEK293T cells expressing vector control or K5Q-HP1 $\gamma$  via flow cytometry assay for the percentage of GFP<sup>+</sup> cells among RFP<sup>+</sup> cells (mean  $\pm$  s.d.; n= 3 independent experiments). **e** Co-IP assay for HP1 $\gamma$ -WT, -K5Q or -K5R with MDC1, HDAC1 and H3K9me3 in HEK293T cells. Input, 2% whole lysate; IP, M2-flag antibody. **f** Alteration of IC<sub>50</sub> to BTZ treatment in the HP1 $\gamma$ -WT, -K5R and -K5Q in MM.1S cells (mean  $\pm$  s.d.; n= 3 independent experiments). **g** Cell proliferation of MM.1S cells stably expressing HP1 $\gamma$ -WT, -K5Q or -K5R for 72 hr. *P* values were

determined by two-way ANOVA test (**c, g**) and Student's t test (**d**). Source data are provided as a Source data file (mean  $\pm$  s.d.; n= 3 independent experiments).

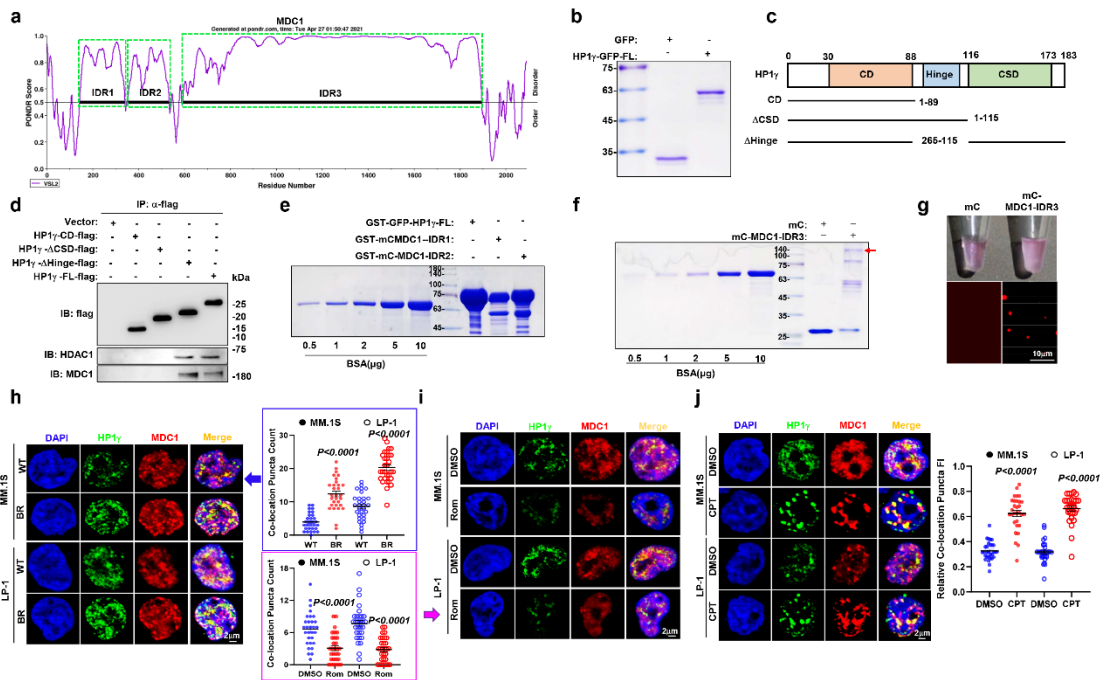

**Supplementary Fig. 7: Interaction with MDC1-IDR1 enhances HP1 $\gamma$  droplet formation *in vitro*.** **a** Analysis of the MDC1 protein sequence for intrinsically disordered regions using the program VSL2. **b** Coomassie blue staining to show *in vitro* expression of GFP and HP1 $\gamma$ -GFP-FL fusion protein. **c** Schematic illustration of strategy to construct HP1 $\gamma$  truncations. **d** Immunoprecipitation assay to show interactions of full length HP1 $\gamma$  (FL) or truncations with HDAC1 or MDC1 in HEK293T cells. **e** Coomassie blue staining to show *in vitro* expression of GST-GFP-HP1 $\gamma$ -FL, GST-MDC1-mC (mCherry) -IDR1 and GST-MDC1-mC-IDR1 protein, and **(f)** mC and mC-MDC1-IDR3 protein. **g** Visualization of turbidity associated with droplet formation *in vitro* for mC and mC-MDC1-IDR3 protein. **h** Representative images for HP1 $\gamma$  and MDC1 foci in WT and BR MM cells, and **(i)** MM cells treated with or without Rom, and **(j)** CPT. Quantification of puncta count or relative puncta FI (fluorescence intensities) in 30 cells are shown in images. Two-sided *P* calculated using Student's t test; mean  $\pm$  s.d.; n= 3 independent experiments. Source data are provided as a Source data file.

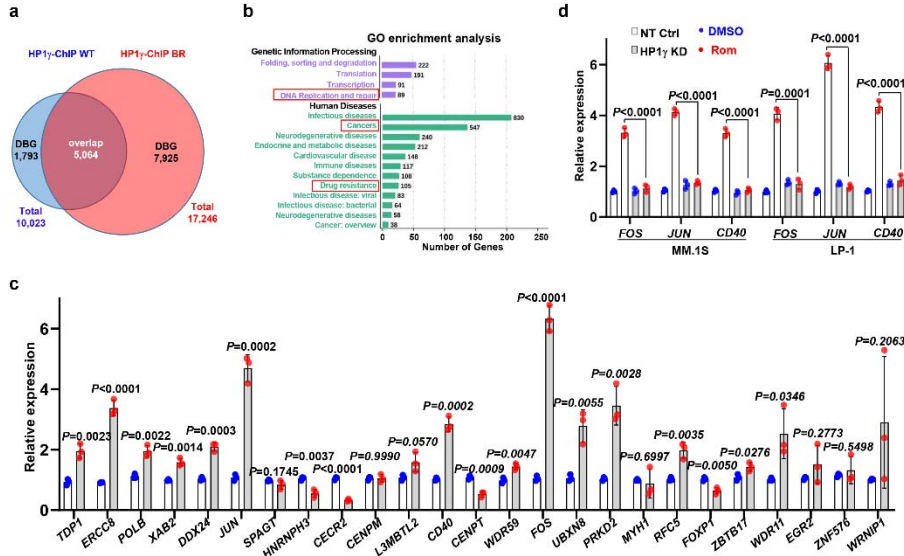

**Supplementary Fig. 8: HP1 promotes transcription of resistance genes.** **a** Venn diagram shows the number of overlapped genes between WT and BR cells in HP1 $\gamma$ -ChIP seq. **b** KEGG analysis for differentially expressed genes with a  $P < 0.05$  using DAVID methods. **c** QPCR shows expression of selected genes which overlapped between ChIP seq and RNA seq in WT and BR MM cells, and **(d)** *FOS*, *JUN* and *CD40* genes expression in NT Ctrl and HP1 $\gamma$  KD cells treated with DMSO or Rom, mean  $\pm$  s.d.;  $n = 3$  independent experiments, and  $P$  values were determined by Student's  $t$  test. Source data are provided as a Source data file.

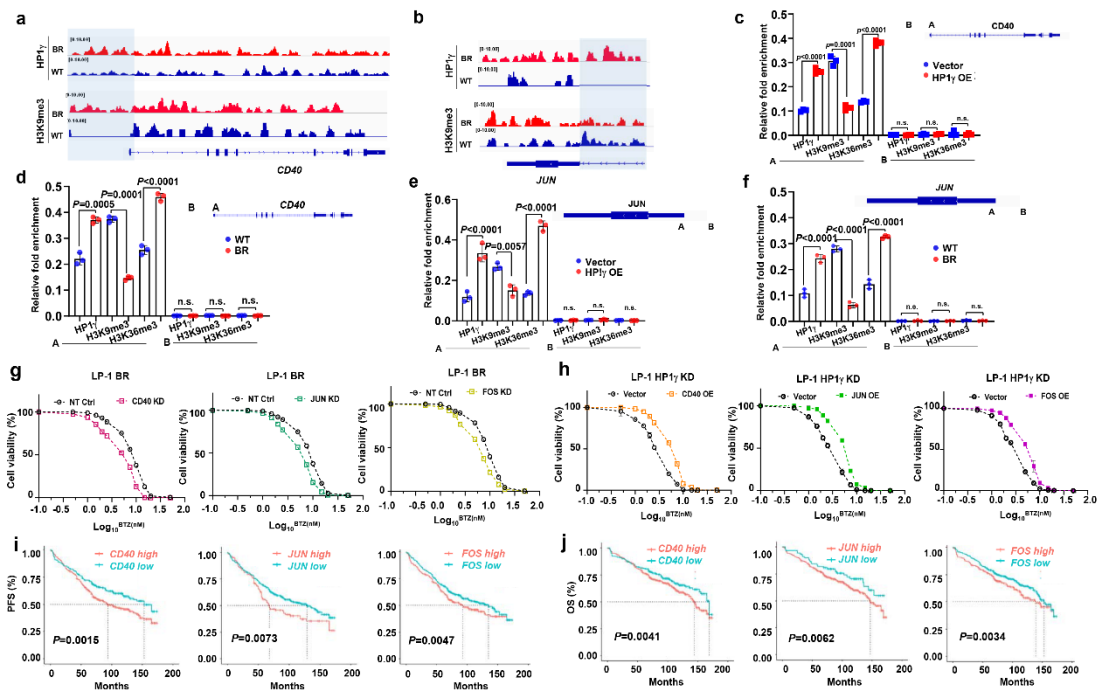

**Supplementary Fig. 9: HP1 $\gamma$  facilitates chromatin accessibility of genes governing drug sensitivity.** **a** Gene tracks showing representative ChIP-Seq profiles for the indicated proteins and histone marks at the *CD40*, and **(b)** *JUN* gene loci. ChIP-qPCR assay to show enrichment of HP1 $\gamma$ , H3K9me3 and H3K36me3 at gene loci of **(c)** *JUN*, and **(e)** *CD40* in the Vector and HP1 $\gamma$  overexpressing LP-1 cells, **(d)** *JUN*, and **(f)** *CD40* in WT and BR LP-1 cells (mean  $\pm$  s.d.; n= 3 independent experiments). **g** Alteration of IC50 to BTZ treatment in the NT Ctrl, CD40 KD, JUN KD and FOS KD LP-1 cells (n = 3), and **(h)** in the Vector, CD40 OE, JUN OE and FOS OE LP-1 cells with HP1 $\gamma$  KD stably (mean  $\pm$  s.d.; n= 3 independent experiments). **i** Correlation of *FOS*, *JUN* and *CD40* expression with progression free survival (PFS), **(j)** overall survival (OS) in patients after receiving BTZ-based treatment regimens from the coMMpass cohort. *P* values were determined by Pearson's coefficient and log-rank test. Source data are provided as a Source data file.

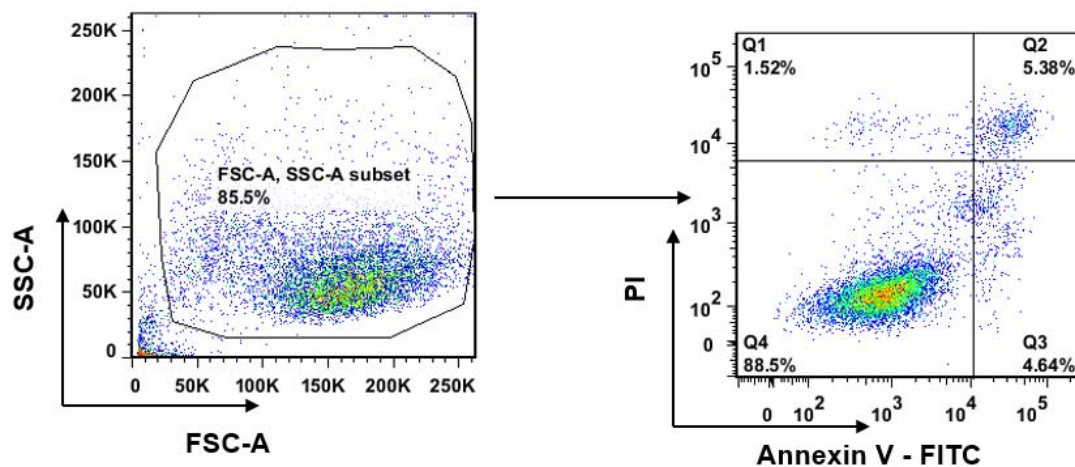

**Supplementary Fig. 10: Flow cytometry gating schemes.** **a** Gating scheme used for analysis of apoptosis. First debris were excluded (FSC-A vs SSC-A), and apoptosis cells were assessed for Annexin V and PI expression, then cells were separated into viability (Annexin V- PI-), early apoptosis (Annexin V+ PI-) and late apoptosis (Annexin V+ PI+). Gating is related to Fig. 1m, Fig. 8a and Supplementary Fig. 2d.



## Supplementary Tables

| Category                                                  | Source                    | Cat. No.   |
|-----------------------------------------------------------|---------------------------|------------|
| <b>Antibodies</b>                                         |                           |            |
| Anti-rabbit HP1 $\gamma$                                  | Cell signaling technology | 2619       |
| Anti-rabbit Acetylated-Lysine                             | Cell signaling technology | 9441       |
| Anti-rabbit CBX3                                          | Abclonal                  | A2248      |
| Anti-mouse HP1 $\gamma$ , clone 42s2                      | millipore                 | 05-690     |
| Anti-rabbit GFP (D5.1)                                    | Cell signaling technology | 2956       |
| Anti-rabbit HDAC1                                         | Abclonal                  | A0238      |
| Anti-rabbit HDAC2                                         | Abclonal                  | A2084      |
| Anti-mouse phospho-Histone H2A.X                          | millipore                 | 05-636     |
| Anti-mouse MDC1                                           | millipore                 | 05-1572    |
| Anti-PARP                                                 | Cell signaling technology | 9532       |
| Anti-rabbit $\beta$ -actin                                | Abclonal                  | AC006      |
| Anti-mouse Ub                                             | Cell signaling technology | 3936       |
| Anti-Histone H3 (tri methyl K9) antibody-ChIP Grade       | Cell signaling technology | 13969      |
| Anti-H3K36me3 antibody [D5A7] - ChIP Grade                | Cell signaling technology | 4909       |
| Anti-rabbit HA-Tag(C29F4)                                 | Cell signaling technology | 3724       |
| Anti-rabbit GFP-Tag pAb                                   | Abclonal                  | AE011      |
| Anti-mouse GST-Tag mAb                                    | Abclonal                  | AE001      |
| Anti-rabbit KAP1/TRIM28 pAb                               | Abclonal                  | A2245      |
| Anti-rabbit Phospho-p95/NBS1 (Ser343)                     | Cell signaling technology | 3001       |
| Anti-rabbit Phospho-ATM (Ser1981) (D6H9) mAb              | Cell signaling technology | 5883       |
| Anti-rabbit GAPDH pAb                                     | Abclonal                  | AC001      |
| Anti-rabbit Histone H3 (D1H2) XP mAb                      | Cell signaling technology | 4499       |
| Goat Anti-Rabbit IgG-HRP                                  | Sigma-Aldrich             | A0545      |
| ANTI-FLAG <sup>®</sup> M2-Peroxidase                      | Sigma-Aldrich             | A8592      |
| Rabbit Anti Mouse IgG-HRP                                 | Sigma-Aldrich             | A9044-2ML  |
| Alexa Fluor <sup>®</sup> 555 donkey anti-rabbit IgG (H+L) | Invitrogen                | A31572     |
| Alexa Fluor <sup>®</sup> 488 donkey anti-rabbit IgG (H+L) | Invitrogen                | A11034     |
| Anti-rabbit IgG                                           | Proteintech               | 30000-0-AP |
| Anti-mouse IgG                                            | Proteintech               | B900620    |
| <b>Chemicals, Peptides and Recombinant Proteins</b>       |                           |            |
| 3FLAG peptide                                             | Sigma-Aldrich             | F4799      |
| FLAG Peptide                                              | Sigma-Aldrich             | F3290      |

| <b>Drugs</b>                      |                                                                          |            |
|-----------------------------------|--------------------------------------------------------------------------|------------|
| Bortezomib (PS-341)               | SelleckChem                                                              | S1013      |
| Romidepsin                        | MedChemExpress                                                           | HY-15149   |
| Puromycin 2HCL                    | SelleckChem                                                              | S7417      |
| Cycloheximide                     | Sigma-Aldrich                                                            | C7698      |
| Camptothecin                      | Gift from Dr. Lei Shi, Tianjin Medical University                        |            |
| <b>Enzymes</b>                    |                                                                          |            |
| RNase A, DNase and protease-free  | Thermo Fisher                                                            | EN0531     |
| Proteinase K Solution, ChIP grade | Thermo Fisher                                                            | 26160      |
| Benzonase Nuclease                | Sigma-Aldrich                                                            | E1014-25KU |
| NotI-HF                           | NewEngland Biolabs                                                       | R3189S     |
| BamHI                             | NewEngland Biolabs                                                       | R0136S     |
| EcoRI                             | NewEngland Biolabs                                                       | R0101S     |
| KpnI-HF                           | NewEngland Biolabs                                                       | R3142S     |
| XhoI                              | NewEngland Biolabs                                                       | R0146S     |
| AgeI                              | NewEngland Biolabs                                                       | R3552S     |
| CutSmart Buffer                   | NewEngland Biolabs                                                       | 137204S    |
| T4 DNA Ligase                     | NewEngland Biolabs                                                       | M0202S     |
| 10×Buffer for T4 DNA ligase       | NewEngland Biolabs                                                       | B0202S     |
| Multiscribe Reverse Transcriptase | ABI                                                                      | 4308228    |
| dNTP mix                          | ABI                                                                      | 362275     |
| <b>Plasmids</b>                   |                                                                          |            |
| hU6-MSC-Ubiquitin-eGFP            | Shanghai genechem                                                        | GV298      |
| CBX3-shRNA1                       | Shanghai genechem                                                        | PSC57295-1 |
| CBX3-shRNA2                       | Shanghai genechem                                                        | PSC57297-1 |
| CBX3-shRNA3                       | Shanghai genechem                                                        | PSC57296-1 |
| pLKO.1                            |                                                                          |            |
| HDAC1-flag                        | Gift from Dr. Dr. Robert Orlowski, UT MD Anderson Cancer Center          |            |
| HR-GFP receptor                   | Gift from Dr. Jun Li, Peking Union Medical College                       |            |
| NHEJ-GFP receptor                 | Gift from Dr. Jun Li, Peking Union Medical College                       |            |
| pcDNA-3×FALG                      | Gift from Dr. Michael Naksi lab, UT Health Science Center at San Antonio |            |
| pITA                              | Gift from Dr. Yupeng Chen, Tianjin Medical University                    |            |
| psPAX <sub>2</sub>                | Gift from Dr. Xudong Wu, Tianjin Medical University, Dept. Cell Biology  |            |
| pMD2.G                            | Gift from Dr. Xudong Wu, Tianjin Medical University, Dept. Cell Biology  |            |
| pEGFP-C1                          | Gift from Dr. Yupeng Chen, Tianjin Medical University                    |            |
| pGEX-6p-1-GFP-A206K               | Gift from Dr. Yupeng Chen, Tianjin Medical University                    |            |
| pITA insert-CBX3-N-FLAG           | Self-construction                                                        |            |
| pITA insert-CBX3-C-FLAG           | Self-construction                                                        |            |
| pEGFP-C1-CBX3-WT                  | Self-construction                                                        |            |

|                                                                    |                          |                  |
|--------------------------------------------------------------------|--------------------------|------------------|
| pEGFP-C1-CBX3-K5Q                                                  | Self-construction        |                  |
| pEGFP-C1-CBX3-K5R                                                  | Self-construction        |                  |
| pGEX-5X-3-CBX3                                                     | Self-construction        |                  |
| pGEX-6p-1-GFP-A206K-CBX3-IDR1-WT                                   | Self-construction        |                  |
| pGEX-6p-1-GFP-A206K-CBX3-IDR1-K5Q                                  | Self-construction        |                  |
| pGEX-6p-1-GFP-A206K-CBX3-IDR1-K5R                                  | Self-construction        |                  |
| pGEX-6p-1-GFP-A206K-CBX3-IDR1-KAIIQ                                | Self-construction        |                  |
| MDC1 shRNA1                                                        | Self-construction        |                  |
| MDC1 shRNA2                                                        | Self-construction        |                  |
| <b>Critical Commercial Assays</b>                                  |                          |                  |
| EvaGreen 2X qPCR MasterMix                                         | ABI                      | MasterMix-R      |
| 5×All-In-One RT MasterMix                                          | abm                      | G490             |
| Pierce BCA Protein Assay Kit                                       | Thermo SCIENTIFIC        | 23225            |
| AxyPrep DNA Extraction Kit                                         | AXYGEN                   | 295 AP-GX-250G   |
| AxyPrep Plasmid Miniprep Kit                                       | AXYGEN                   | 183 AP-MN-P-250G |
| Plasmid Maxi Kit (25)                                              | QIAGEN                   | 12163            |
| EnVision G12 Doublestain System, Rabbit/Mouse (DAB+/Permanent Red) | Dako                     | K5361            |
| SuperSignal West Dura Extended Duration Substrate                  | ThermoFisher             | 34580            |
| 9002 SimpleCHIP® Kit                                               | Cell Signaling           | 22188S           |
| Simple CHIP® Kits-20C-Reagents                                     | Cell Signaling           | 45061S           |
| ChIP-grade Protein A/G Magnetic Beads                              | Thermo SCIENTIFIC        | 26162            |
| ANTI-FLAG M2 Affinity Gel                                          | Sigma-Aldrich            | A2220            |
| CellTiter 96 Aqueous One Solution                                  | Promega                  | G358B            |
| NuPAGE 4-12% Bis-Tris Gel                                          | Invitrogen               | NP0335BOX        |
| Phosphatase Inhibitor Cocktail (100×)                              | Cell Signaling           | 5870S            |
| Annexin V-FITC Apoptosis Kit                                       | Sigma-Aldrich            | APOAF-50TST      |
| Pierce® Protein G Plus Agarose                                     | Thermo Scientific        | 22852            |
| Human CD20 MicroBeads                                              | Miltenyi Biotec          | MB17-R0829       |
| Human CD138 MicroBeads                                             | Miltenyi Biotec          | 130-105-961      |
| DeadEnd™ Fluorometric TUNEL System                                 | Promega                  | G3250            |
| Ficoll-Paque PLUS endotoxin tested                                 | GE Healthcare            | 17-1440-02       |
| LS Columns (25 columns)                                            | Miltenyi Biotec          | 130-042-401      |
| TRIzol Reagent                                                     | Ambion, Life Science     | 15596018         |
| Opti-MEM®I (1×) Reduced Serum                                      | Gibco, Life Technologies | 31985-070        |

|                                       |                                  |         |
|---------------------------------------|----------------------------------|---------|
| Cell Cycle and Apoptosis Analysis Kit | Beyotime                         | C1052   |
| Opti-protein XL Marker                | ABM                              | G266    |
| PageRuler Prestained protein Ladder   | ThermoFisher Scientific          | 26616   |
| 1Kb Ladder DNA Marker                 | Biomed                           | MD114   |
| 1Kb DNA Ladder                        | TIANCEN                          | MD111   |
| 100bp DNA Ladder                      | TRANS                            | BM301   |
| BM15000 DNA Marker                    | Biomed                           | MD106   |
| 1Kb Plus DNA Ladder                   | Solarbio                         | M1500   |
| PEI-Transferrinfection Kit            | ThermoFisher Scientific          | BMS1003 |
| <b>Primer sequences</b>               |                                  |         |
| Human GAPDH-F                         | TTGCCCTCAACGACCACTTT             |         |
| Human GAPDH-R                         | TGGTCCAGGGGTCTTACTCC             |         |
| Human CBX3-F                          | TGCTGCTGACAAACCAAGAG             |         |
| Human CBX3-R                          | CACCAAGTCTGCCTCATCTG             |         |
| Human CBX5-F                          | GGCAACAGATTCTGTGGTG              |         |
| Human CBX5-R                          | GCATGCCATGTCAGTCTCTC             |         |
| Human CBX1-F                          | AAGGGAGAGGAGAGCAAACC             |         |
| Human CBX1-R                          | TTGACATTGGCTTCCTTGGC             |         |
| Mouse Fos-F                           | TGTGTTCTGGCAATAGCGT              |         |
| Mouse Fos-R                           | ACCACCTCGACAATGCATGA             |         |
| Mouse Jun-F                           | GGGAGCATTTGGAGAGTCCC             |         |
| Mouse Jun-R                           | TTTGCAAAGTTCGCTCCCG              |         |
| Mouse Cd40-F                          | TTGTTGACAGCGGTCCATCT             |         |
| Mouse Cd40-R                          | CACATGCCTCGCAATCCTTG             |         |
| Human FOS-F                           | GGGGCAAGGTGGAACAGTTAT            |         |
| Human FOS-R                           | AGGTTGGCAATCTCGGTCTG             |         |
| Human JUN-F                           | GCCAGGTCGGCAGTATAGTC             |         |
| Human JUN-R                           | GGACTCTGCCACTTGTCTCC             |         |
| Human CD40-F                          | ACTGATGTTGTCTGTGGTCCC            |         |
| Human CD40-R                          | GGCCACCTTTTTGATAAAGACCAGC        |         |
| FOS-A-F                               | GCGGCCGGGCCGGGGAGGCC             |         |
| FOS-A-R                               | CCCTTCTCCACTCTTCGGGC             |         |
| FOS-B-F                               | ACACCACTGCACTCCAGCCT             |         |
| FOS-B-R                               | GCCTACGTAAATGCTGCCGC             |         |
| JUN-A-F                               | GCAACTCGGCGCGGATGGAG             |         |
| JUN-A-R                               | GGGGCAGTTTTTATAGTGGG             |         |
| JUN-B-F                               | GCAACTCGGCGCGGATGGAG             |         |
| JUN-B-R                               | GGGCAGTTTTTATAGTGGGC             |         |
| CD40-A-F                              | TTCCATCCTCCCTGATCTGTGAGGT        |         |
| CD40-A-R                              | CTCCACGTTGGCCAGGCTGGTCTCA        |         |
| CD40-B-F                              | GGGGAGAAAATCTTCATCAT             |         |
| CD40-B-R                              | CTTTCTCACCCTTCAAGGTC             |         |
| pITA-CBX3-N-flag-KpnI-F               | CGGGGTACCATGGATTACAAGGATGACGACGA |         |

|                                            |                                                                                 |
|--------------------------------------------|---------------------------------------------------------------------------------|
|                                            | TAAGGCCTCCAACAAAACACTAC                                                         |
| pITA-CBX3-N-flag-BamHI-R                   | CGCGGATCCTTATTGAGCTTCATCTTCTG                                                   |
| pITA-CBX3-C-flag-KpnI-F                    | CGGGGTACCATGGCCTCCAACAAAACACTACATT                                              |
| pITA-CBX3-C-flag-BamHI-R                   | CGCGGATCCTTACTTATCGTCGTCATCCTTGTA<br>ATCTTGAGCTTCATCTTCTGG                      |
| pEGFP-C1-CBX3-C-flag-KpnI-F                | CGGGGTACCATGGCCTCCAACAAAACACTACATT                                              |
| pEGFP-C1-CBX3-C-flag-BamHI-R               | CGCGGATCCTTACTTATCGTCGTCATCCTTGTA<br>ATCTTGAGCTTCATCTTCTGG                      |
| pEGFP-C1-CBX3-K5Q-F                        | CGATAAGGCCTCCAACCAGACTACA                                                       |
| pEGFP-C1-CBX3-K5Q-R                        | TTTTTTGCAATGTAGTCTGGTTGGA                                                       |
| pEGFP-C1-CBX3-K5R-F                        | CGATAAGGCCTCCAACAGGACTACA                                                       |
| pEGFP-C1-CBX3-K5R-R                        | TTTTTTGCAATGTAGTCTGGTTGGA                                                       |
| pGEX-5X-3-CBX3-BamHI-F                     | GCGGATCCATGGCCTCCAACAAAACACTACAT                                                |
| pGEX-5X-3-CBX3-XhoI-R                      | CCGCTCGAGTTATTGAGCTTCATCTTCTGG                                                  |
| pGEX-6p-1-GFP-A206K-CBX3-IDR1-WT-XhoI-F    | CCGCTCGAGATGGCCTCCAACAAAAC                                                      |
| pGEX-6p-1-GFP-A206K-CBX3-IDR1-WT-NotI-R    | ATAAGAATGCGGCCGCTTAATTCACTACACGT<br>CGATC                                       |
| pGEX-6p-1-GFP-A206K-CBX3-IDR1-K5Q-XhoI-F   | CCGCTCGAGATGGCCTCCAACCAGAC                                                      |
| pGEX-6p-1-GFP-A206K-CBX3-IDR1-K5Q-NotI-R   | ATAAGAATGCGGCCGCTTAATTCACTACACGT<br>CGATC                                       |
| pGEX-6p-1-GFP-A206K-CBX3-IDR1-K5R-XhoI-F   | CCGCTCGAGATGGCCTCCAACAGGAC                                                      |
| pGEX-6p-1-GFP-A206K-CBX3-IDR1-K5R-NotI-R   | ATAAGAATGCGGCCGCTTAATTCACTACACGT<br>CGATC                                       |
| pGEX-6p-1-GFP-A206K-CBX3-IDR1-KAllQ-XhoI-F | CCGCTCGAGGCCTCCAACCAAACACTACATTGCA<br>ACAAATGGGACAACAACAGAATGGACAGAGT<br>CAACAA |
| pGEX-6p-1-GFP-A206K-CBX3-IDR1-KAllQ-M      | CAGAGTCAACAAGTTGAAGAGGCAGAGCCTGA<br>AGAATTTGTCGTGGAACAAGTACTAGAT                |
| pGEX-6p-1-GFP-A206K-CBX3-IDR1-KAllQ-NotI-R | ATTTGCGGCCGCCTATTAATTCACTACACGT<br>ATCTAGTACCTG                                 |
| Human MDC1-shRNA1-F                        | CCGGCCCTGAATCAACTGTCCCTATCTCGAGAT<br>AGGGACAGTTGATTCAGGGTTTTTG                  |
| Human MDC1-shRNA1-R                        | AATTCAAAAACCCTGAATCAACTGTCCCTATCT<br>CGAGATAGGGACAGTTGATTCAGGG                  |
| Human MDC1-shRNA3-F                        | CCGGCCTCAGTAGTTGCAGATGTAACCTCGAGTT<br>ACATCTGCAACTACTGAGGTTTTTG                 |
| Human MDC1-shRNA3-R                        | AATTCAAAAACCCTCAGTAGTTGCAGATGTAAC<br>TCGAGTTACATCTGCAACTACTGAGG                 |
